# Supplementary material
Source: HighWire-hosted journal article supplement (https://ard.bmj.com/content/80/2/169)
Supplement: inline-supplementary-material-1 [file inline-supplementary-material-1.pdf]

## Supplementary online content

**Table S1.** Description of the creation of the RA population and general population referents.

**Table S2.** Definition of main outcome and sensitivity analyses.

**Table S3.** Degree of missing data, clinical characteristics.

**Table S4.** Characteristics of underlying RA cohort by first and last visit of study period.

**Table S5.** Cumulative incidence and risk ratios for DAS28 on the VTE outcomes, stratified by DAS28 category.

**Table S6.** Probability in percent (95% CI) of VTE event within 1 year by DAS28 category.

**Table S7.** Risk ratios for VTE of DAS28 activity from all sensitivity analyses.

**Table S8.** Cumulative incidence of VTE and relative risks from main definition and sensitivity analyses.

**Figure S1.** Overview of study design.

**Figure S2.** Risk ratios for the association between DAS28 and VTE by specified stratification.

**Figure S3.** Risk ratios from all sensitivity analyses for the association between DAS28 category and risk of VTE.

**Figure S4.** Risk ratios for the association between DAS28 category and VTE, PE and DVT after multiple imputation.

**Table S1. Description of the creation of the RA population and general population referents.**

| RA population              |                 | General population referents |                     |
|----------------------------|-----------------|------------------------------|---------------------|
| 322,601 visits             | 46,316 patients | 1,497,647 visits             | 215,843 individuals |
| ↓                          |                 | ↓                            |                     |
| Removal of prevalent VTE   |                 | Removal of prevalent VTE     |                     |
| 321,213 visits             | 46,284 patients | 1,492,060 visits             | 215,619 individuals |
| ↓                          |                 | ↓                            |                     |
| Removal of censored visits |                 | Removal of censored visits   |                     |
| 317,225 visits             | 45,749 patients | 1,469,462 visits             | 212,079 individuals |

**Table S2. Definition of main outcome and sensitivity analyses.**

| <b>Outcome</b>                | <b>Definition</b>                                                                                                                                | <b>Time period</b>                             | <b>Exclusion</b>                              | <b>Codes used</b>                                                                              |
|-------------------------------|--------------------------------------------------------------------------------------------------------------------------------------------------|------------------------------------------------|-----------------------------------------------|------------------------------------------------------------------------------------------------|
| <b>Main outcome</b>           | VTE within 1 year after SRQ registered rheumatologist visit.                                                                                     | From date of SRQ visit up until 365 days after | If VTE within 1 year before date of SRQ visit | ICD-10 diagnosis of I26, I80-82 or pulmonary embolism listed as the underlying cause of death. |
| <b>Sensitivity analysis 1</b> | VTE (main outcome) and anticoagulant collected at pharmacy within 30 days after diagnosis OR death from any cause within 30 days from diagnosis. | As main outcome                                | As main outcome                               | As main outcome and ATC = B01AA, B01AB, B01AE, B01AF or B01AX                                  |
| <b>Sensitivity analysis 2</b> | As main outcome but excluding all cases with ever VTE before SRQ visit.                                                                          | As main outcome                                | If ever VTE before SRQ visit                  | As main outcome (ICD9 codes for those diagnoses prior to 1997: DVT=451-453 PE=415)             |
| <b>Sensitivity analysis 3</b> | As main outcome but "prevalent VTE" defined as VTE within 180 (instead of 365) days before SRQ visit.                                            | As main outcome                                | As main outcome                               | As main outcome                                                                                |
| <b>Sensitivity analysis 4</b> | As main outcome but time band for VTE assessment ending 180 days instead of 365 days after the visit.                                            | From date of SRQ visit up until 180 days after | As main outcome                               | As main outcome                                                                                |
| <b>Sensitivity analysis 5</b> | As main outcome but ICD codes for unspecified phlebitis and thrombophlebitis excluded from the VTE definition.                                   | As main outcome                                | As main outcome                               | As main outcome except from I80.0, I80.3, I80.8, I80.9, I82.0 or I82.1                         |
| <b>Sensitivity analysis 6</b> | As main outcome                                                                                                                                  | As main outcome                                | If previous SRQ visit within – 365 days.      | As main outcome                                                                                |
| <b>Sensitivity analysis 7</b> | As main outcome but including only 1 randomly chosen SRQ visit from each patient                                                                 | As main outcome                                | As main outcome                               | As main outcome                                                                                |
| <b>Sensitivity analysis 8</b> | As main outcome but including only the first visit from each patient                                                                             | As main outcome                                | As main outcome                               | As main outcome                                                                                |
| <b>Sensitivity analysis 9</b> | As main outcome and applying multiple imputation                                                                                                 | As main outcome                                | As main outcome                               | As main outcome                                                                                |

**Table S3. Degree of missing data, clinical characteristics.**

|                          | Percentage missing |                |     |              |      |
|--------------------------|--------------------|----------------|-----|--------------|------|
|                          | RA pop             | DAS28 category |     |              |      |
| <b>Clinical RA data</b>  |                    | Remission      | Low | Intermediate | High |
| RA duration              | 1%                 | 1%             | 2%  | 1%           | 1%   |
| DAS28                    | 17%                | 0%             | 0%  | 0%           | 0%   |
| DAS28CRP                 | 12%                | 1%             | 1%  | 1%           | 1%   |
| CRP                      | 4%                 | 1%             | 1%  | 1%           | 1%   |
| ESR                      | 10%                | 0%             | 0%  | 0%           | 0%   |
| CDAI                     | 90%                | 87%            | 89% | 90%          | 90%  |
| CDAI (algorithm)         | 14%                | 4%             | 5%  | 5%           | 4%   |
| HAQ                      | 11%                | 4%             | 5%  | 5%           | 6%   |
| Number of swollen joints | 4%                 | 0%             | 0%  | 0%           | 0%   |
| Number of tender joints  | 4%                 | 0%             | 0%  | 0%           | 0%   |
| VAS global               | 7%                 | 0%             | 0%  | 0%           | 0%   |
| VAS pain                 | 8%                 | 1%             | 1%  | 1%           | 2%   |
| Smoker                   | 52%                | 48%            | 51% | 55%          | 61%  |

**Table S4. Characteristics of underlying RA cohort by first and last visit of study period.**

|                                          | <b>First visits</b>    | <b>Last visits</b>     |
|------------------------------------------|------------------------|------------------------|
| N                                        | 46316                  | 46316                  |
| Age at visit, median (IQR)               | 62 (51-70)             | 67 (56-75)             |
| Male (%)                                 | 29%                    | 29%                    |
| RA duration, median (IQR)                | 4.0 (0.7-13.1)         | 10.3 (4.4-19.2)        |
| Year of visit, median (IQR)              | 2010.0 (2007.0-2014.0) | 2016.0 (2014.0-2017.0) |
| <b>Clinical RA data</b>                  |                        |                        |
| DAS28ESR, median (IQR)                   | 4.1 (2.9-5.3)          | 2.8 (2.0-3.8)          |
| DAS28CRP, median (IQR)                   | 3.8 (2.7-4.9)          | 2.5 (1.8-3.5)          |
| CRP, median (IQR)                        | 7.0 (4.0-18.0)         | 4.7 (2.0-8.7)          |
| ESR, median (IQR)                        | 19.0 (10.0-34.0)       | 14.0 (7.0-26.0)        |
| HAQ, median (IQR)                        | 0.9 (0.4-1.4)          | 0.8 (0.1-1.3)          |
| Swollen joint count, median (IQR)        | 3.0 (0.0-7.0)          | 0.0 (0.0-2.0)          |
| Tender joint count, median (IQR)         | 3.0 (0.0-7.0)          | 0.0 (0.0-3.0)          |
| VAS global, median (IQR)                 | 45.0 (21.0-65.0)       | 30.0 (11.0-54.0)       |
| VAS pain, median (IQR)                   | 44.0 (21.0-66.0)       | 29.0 (10.0-53.0)       |
| Seropositive, (%)                        | 74%                    | 74%                    |
| Seronegative, unknown (%)                | 26%                    | 27%                    |
| Smoker (%)                               | 42%                    | 61%                    |
| <b>Comorbidities<sup>a</sup></b>         |                        |                        |
| ACS (%)                                  | 2%                     | 3%                     |
| Other cardiac disease (%)                | 23%                    | 33%                    |
| Prev VTE (%)                             | 1%                     | 2%                     |
| Chronic kidney disease (%)               | 1%                     | 2%                     |
| Cancer (in past 10 years) (%)            | 4%                     | 6%                     |
| COPD (%)                                 | 14%                    | 17%                    |
| Diabetes (%)                             | 9%                     | 12%                    |
| Number of hospitalizations, median (IQR) | 6 (3-12)               | 6 (3-12)               |

|                                                |           |            |
|------------------------------------------------|-----------|------------|
| Number of specialist care visits, median (IQR) | 19 (9-36) | 38 (21-66) |
| <b>Treatments<sup>b</sup></b>                  |           |            |
| Methotrexate (%)                               | 70%       | 64%        |
| Other csDMARD (%)                              | 17%       | 16%        |
| TNFi (%)                                       | 21%       | 23%        |
| Other b/tsDMARD (%)                            | 2%        | 11%        |
| Number previous biologics, median (IQR)        | 1 (0-1)   | 1 (1-3)    |
| NSAID/ASA (%)                                  | 2%        | 3%         |
| Anitcoagulant <sup>c</sup> (%)                 | 68%       | 51%        |
| Oral estrogen <sup>d</sup> (%)                 | 13%       | 12%        |
| <b>Socioeconomics</b>                          |           |            |
| Married/cohabiting partner (%)                 | 47%       | 48%        |
| Disability pension in previous year (%)        | 2%        | 1%         |
| Sick leave in previous year (%)                | 11%       | 9%         |

<sup>a</sup>Registered within the last 5 years unless otherwise stated

<sup>b</sup>RA treatments: at time of visit. Other treatments: Registered within the last year.

<sup>c</sup>Collected anticoagulant drug from pharmacy within one year before VTE event

<sup>d</sup>Oral contraceptive w estrogen *or* hormone replacement therapy

**Table S5. Cumulative incidence and risk ratios for DAS28 on the VTE outcomes, stratified by DAS28 category.**

| Stratification       | No. of VTE events<br>(Cumulative<br>incidence, %) | No. of<br>visits | Relative risk (95% CI) <sup>a</sup> , versus remission |                   |                   |                   |
|----------------------|---------------------------------------------------|------------------|--------------------------------------------------------|-------------------|-------------------|-------------------|
|                      |                                                   |                  | Remis<br>sion                                          | Low DAS28         | Moderate DAS28    | High Das28        |
| RA duration <5 years | 728 (0.68)                                        | 107038           | 1(ref)                                                 | 1.35 (1.03, 1.78) | 1.45 (1.16, 1.82) | 2.09 (1.63, 2.67) |
| RA duration 5+ years | 1481 (0.72)                                       | 205200           | 1(ref)                                                 | 1.04 (0.85, 1.26) | 1.47 (1.26, 1.72) | 1.97 (1.59, 2.43) |
| Never smoker (2012-) | 458 (0.69)                                        | 66361            | 1(ref)                                                 | 1.07 (0.76, 1.52) | 1.65 (1.26, 2.16) | 2.30 (1.59, 3.31) |
| Smoker (2012-)       | 634 (0.75)                                        | 84958            | 1(ref)                                                 | 1.03 (0.76, 1.38) | 1.62 (1.29, 2.02) | 2.52 (1.88, 3.39) |
| Seropositive         | 1697 (0.70)                                       | 242003           | 1(ref)                                                 | 1.15 (0.96, 1.38) | 1.42 (1.23, 1.65) | 1.97 (1.64, 2.37) |
| Seronegative/unknown | 544 (0.73)                                        | 74280            | 1(ref)                                                 | 1.01 (0.73, 1.40) | 1.65 (1.27, 2.14) | 2.20 (1.59, 3.04) |
| CRP <5               | 738 (0.52)                                        | 143191           | 1(ref)                                                 | 1.02 (0.80, 1.29) | 1.37 (1.12, 1.67) | 2.52 (1.83, 3.49) |
| CRP 5+               | 1401 (0.88)                                       | 159849           | 1(ref)                                                 | 1.12 (0.91, 1.38) | 1.37 (1.15, 1.64) | 1.69 (1.38, 2.07) |
| No previous VTE      | 2089 (0.67)                                       | 313440           | 1(ref)                                                 | 1.12 (0.95, 1.32) | 1.49 (1.31, 1.70) | 2.01 (1.71, 2.37) |
| Previous VTE         | 152 (5.35)                                        | 2843             | 1(ref)                                                 | 1.02 (0.54, 1.90) | 1.01 (0.58, 1.74) | 1.79 (0.98, 3.26) |
| PE                   | 833 (0.26)                                        | 316283           | 1(ref)                                                 | 1.37 (1.05, 1.80) | 1.83 (1.48, 2.27) | 3.06 (2.36, 3.97) |
| DVT                  | 1408 (0.45)                                       | 316283           | 1(ref)                                                 | 1.01 (0.83, 1.23) | 1.32 (1.13, 1.55) | 1.59 (1.30, 1.95) |
| Males                | 664 (0.80)                                        | 82676            | 1(ref)                                                 | 1.01 (0.75, 1.36) | 1.51 (1.21, 1.88) | 1.78 (1.32, 2.41) |
| Females              | 1577 (0.68)                                       | 233607           | 1(ref)                                                 | 1.17 (0.97, 1.42) | 1.47 (1.26, 1.72) | 2.12 (1.75, 2.56) |
| Steroid use          | 1286 (1.00)                                       | 128745           | 1(ref)                                                 | 1.04 (0.84, 1.30) | 1.38 (1.16, 1.63) | 1.71 (1.39, 2.09) |
| No steroid use       | 955 (0.51)                                        | 187538           | 1(ref)                                                 | 1.15 (0.92, 1.43) | 1.36 (1.13, 1.64) | 1.87 (1.44, 2.44) |

<sup>a</sup>Models adjusted for age, sex and calendar year of the visit year.

**Table S6. Probability in percent (95% CI) of VTE event within 1 year by DAS28 category. Probabilities calculated from the unadjusted and adjusted log-binomial model.**

| DAS28 category | Unadjusted model | Adjusted model <sup>a</sup> |                |                |                |                |                |                |                |                |                |
|----------------|------------------|-----------------------------|----------------|----------------|----------------|----------------|----------------|----------------|----------------|----------------|----------------|
|                |                  | Male                        |                |                |                |                | Female         |                |                |                |                |
|                |                  | 40                          | 50             | 60             | 70             | 80             | 40             | 50             | 60             | 70             | 80             |
| Remission      | 0.5 (0.5, 0.6)   | 0.2 (0.2, 0.3)              | 0.3 (0.2, 0.3) | 0.4 (0.4, 0.5) | 0.8 (0.6, 0.9) | 1.1 (0.9, 1.3) | 0.2 (0.1, 0.2) | 0.3 (0.2, 0.3) | 0.4 (0.4, 0.5) | 0.7 (0.6, 0.8) | 1.1 (0.9, 1.2) |
| Low            | 0.6 (0.5, 0.7)   | 0.2 (0.2, 0.3)              | 0.3 (0.2, 0.4) | 0.5 (0.4, 0.6) | 0.9 (0.7, 1.0) | 1.3 (1.0, 1.5) | 0.2 (0.2, 0.3) | 0.3 (0.2, 0.4) | 0.5 (0.4, 0.5) | 0.8 (0.7, 0.9) | 1.2 (1.0, 1.4) |
| Moderate       | 0.8 (0.7, 0.9)   | 0.3 (0.2, 0.4)              | 0.4 (0.3, 0.5) | 0.6 (0.5, 0.8) | 1.1 (0.9, 1.3) | 1.6 (1.4, 1.9) | 0.3 (0.2, 0.3) | 0.4 (0.3, 0.4) | 0.6 (0.5, 0.7) | 1.1 (0.9, 1.2) | 1.5 (1.3, 1.7) |
| High           | 1.1 (0.9, 1.2)   | 0.4 (0.3, 0.5)              | 0.5 (0.4, 0.7) | 0.9 (0.7, 1.0) | 1.5 (1.3, 1.8) | 2.2 (1.8, 2.6) | 0.4 (0.3, 0.5) | 0.5 (0.4, 0.6) | 0.8 (0.7, 1.0) | 1.4 (1.2, 1.6) | 2.1 (1.8, 2.4) |

<sup>a</sup>Model adjusted for age and sex.



**Table S7. Risk ratios for VTE of DAS28 activity from all sensitivity analyses (SA).**

| Model <sup>a</sup> | SA description                                                                | N model | Remission | Low               | Moderate          | High              |
|--------------------|-------------------------------------------------------------------------------|---------|-----------|-------------------|-------------------|-------------------|
| Main exposure      |                                                                               | 263919  | 1 (ref)   | 1.12 (0.96, 1.31) | 1.48 (1.30, 1.68) | 2.03 (1.73, 2.38) |
| SA1                | Main exposure definition + anticoagulant use or death from any cause          | 263919  | 1 (ref)   | 1.14 (0.95, 1.36) | 1.45 (1.26, 1.67) | 1.98 (1.66, 2.37) |
| SA2                | No previous VTE ever                                                          | 255875  | 1 (ref)   | 1.12 (0.94, 1.33) | 1.50 (1.31, 1.72) | 2.06 (1.74, 2.44) |
| SA3                | Prevalent VTE defined as 6 instead of 12 months prior to rheumatologist visit | 264755  | 1 (ref)   | 1.09 (0.94, 1.27) | 1.45 (1.28, 1.64) | 1.97 (1.69, 2.31) |
| SA4                | Time period for VTE assessment 180 instead of 365 days after visit            | 263919  | 1 (ref)   | 1.30 (1.05, 1.61) | 1.58 (1.33, 1.87) | 2.02 (1.62, 2.52) |
| SA5                | Excluding less common ICD codes for VTE                                       | 263919  | 1 (ref)   | 1.18 (0.99, 1.41) | 1.48 (1.29, 1.71) | 2.00 (1.68, 2.39) |
| SA6                | No overlapping time windows per individual                                    | 144919  | 1 (ref)   | 1.15 (0.94, 1.42) | 1.52 (1.29, 1.79) | 2.05 (1.69, 2.49) |
| SA7                | Including only one random visit per individual                                | 36583   | 1 (ref)   | 1.29 (0.89, 1.88) | 1.88 (1.41, 2.52) | 2.59 (1.85, 3.61) |
| SA8                | Including only first visit per individual                                     | 37062   | 1 (ref)   | 0.84 (0.48, 1.48) | 1.40 (0.96, 2.05) | 1.86 (1.27, 2.71) |
| SA9                | Multiple imputation of main exposure                                          | 316200  | 1 (ref)   | 1.13 (0.96, 1.32) | 1.46 (1.28, 1.65) | 2.02 (1.72, 2.37) |
|                    | Multiple imputation of DVT                                                    | 316200  | 1 (ref)   | 1.03 (0.85, 1.24) | 1.31 (1.12, 1.54) | 1.62 (1.33, 1.98) |
|                    | Multiple imputation of PE                                                     | 316200  | 1 (ref)   | 1.35 (1.01, 1.81) | 1.78 (1.42, 2.23) | 2.98 (2.29, 3.87) |

<sup>a</sup>Models adjusted for age, sex and calendar year of the visit year.

**Table S8: Cumulative incidence of VTE and relative risks from main definition and sensitivity analyses (SA) in Swedish patients with RA during 1-year follow-up after rheumatologist visit vs. matched general population referents (1:5), followed from first visit registered after 2006 until 2018.**

|                 | SA description                                                                | No. of VTE events<br>(Cumulative incidence, %) |             | Risk ratio (95% CI) <sup>a</sup> |
|-----------------|-------------------------------------------------------------------------------|------------------------------------------------|-------------|----------------------------------|
|                 |                                                                               | RA pop                                         | Gen pop     |                                  |
| <b>Main exp</b> |                                                                               | 2241 (0.71)                                    | 5301 (0.36) | 1.88 (1.65-2.15)                 |
| <b>SA1</b>      | Main exposure definition + anticoagulant use <i>or</i> death from any cause   | 1754 (0.55)                                    | 3985 (0.27) | 1.92 (1.64, 2.23)                |
| <b>SA2</b>      | No previous VTE ever                                                          | 1849 (0.60)                                    | 4420 (0.31) | 2.02 (1.76, 2.32)                |
| <b>SA3</b>      | Prevalent VTE defined as 6 instead of 12 months prior to rheumatologist visit | 2381 (0.75)                                    | 5561 (0.38) | 1.89 (1.66, 2.16)                |
| <b>SA5</b>      | Excluding 1 less common ICD codes for VTE                                     | 1793 (0.57)                                    | 4078 (0.28) | 1.97 (1.69, 2.28)                |

<sup>a</sup>Risk ratios adjusted for age, sex and calendar year of the visit year.

**Figure S1. Overview of study design. If a VTE event was registered within one year before the visit in question, that visit (but not the individual) was excluded.**

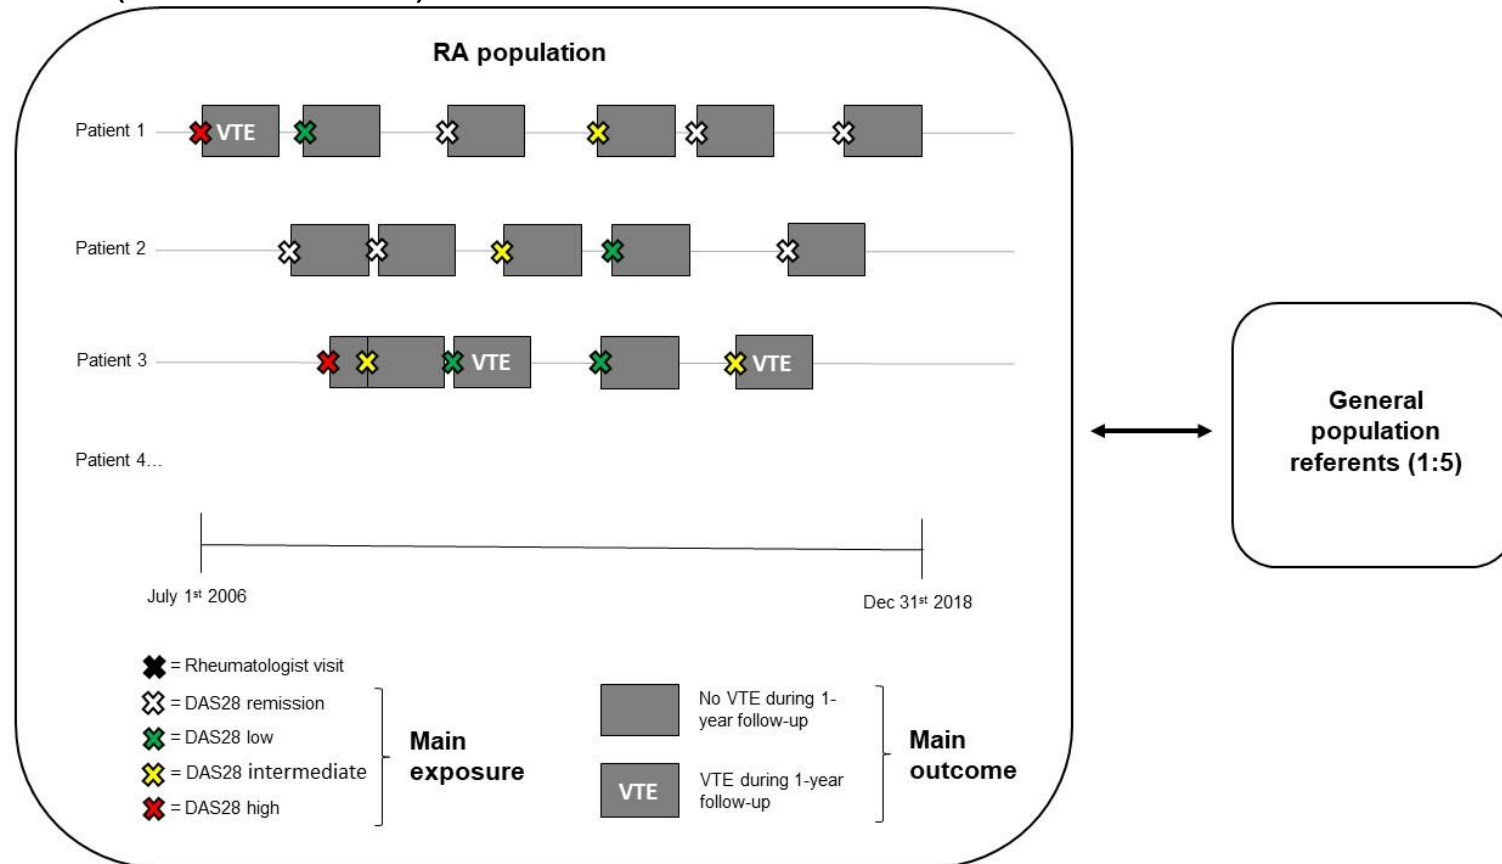

**Figure S2. Risk ratios for the association between DAS28 and VTE stratified by sex, by seropositive (yes vs. no), by RA duration ( $\geq 5$  vs.  $< 5$  years)) and by oral steroid use (yes vs. no) within one year among Swedish patients with RA. Absolute one-year risks are calculated from observed data.**

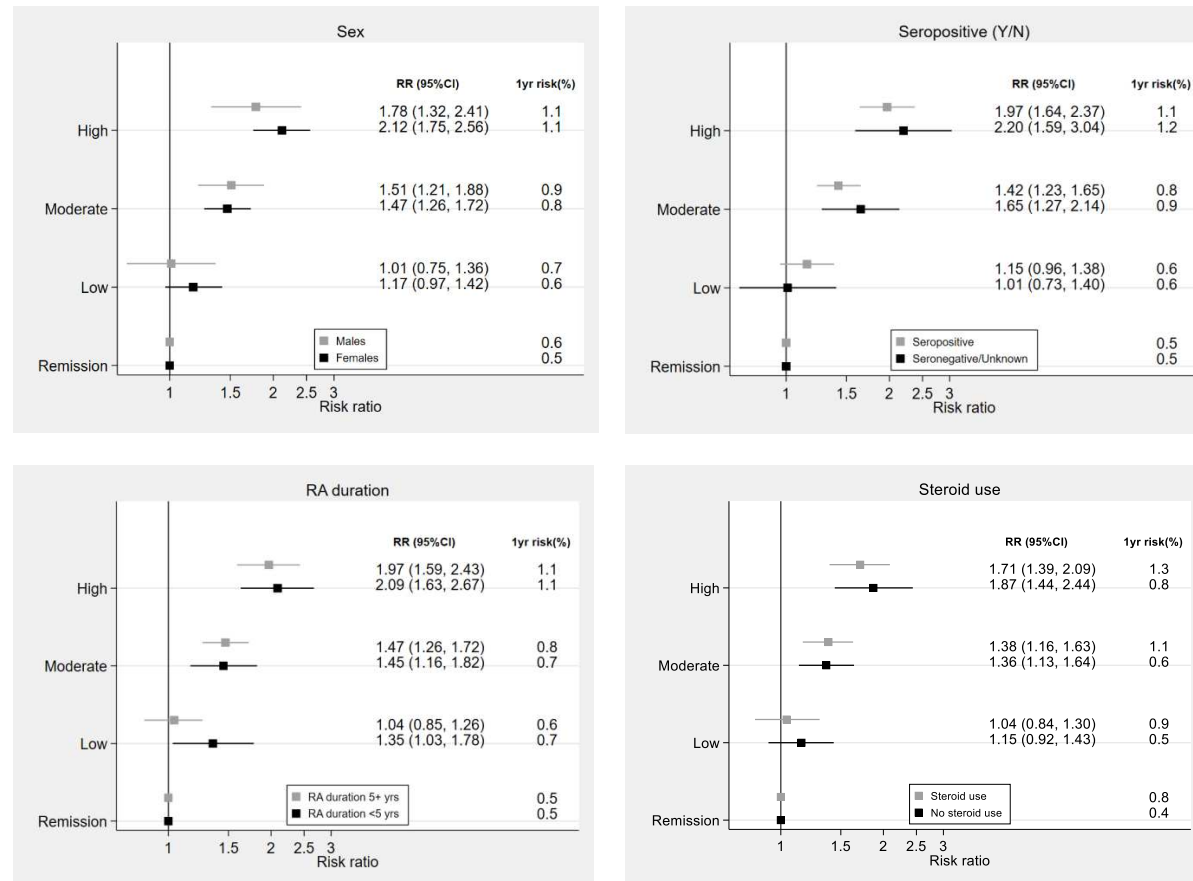

<sup>a</sup>Risk ratios adjusted for age, sex and calendar year of the visit year.

**Figure S3. Risk ratios from all sensitivity analyses for the association between DAS28 category and risk of VTE. Grey estimates represent main exposure, for comparison.**

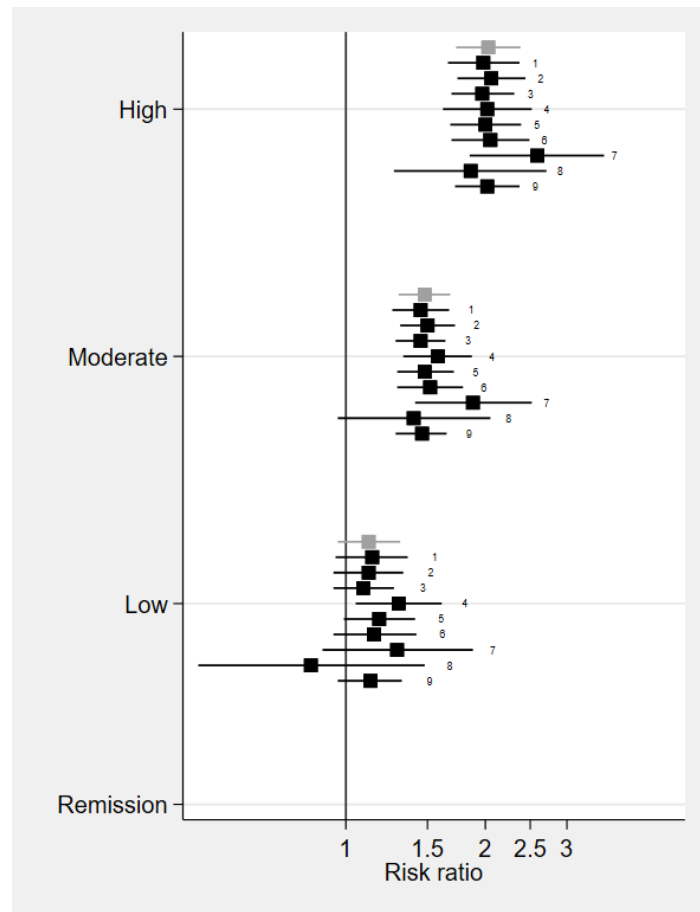

<sup>a</sup>Risk ratios adjusted for age, sex and calendar year of the visit year.

**Figure S4. Risk ratios for the association between DAS28 category and VTE, PE and DVT after multiple imputation. Black estimates represent corresponding risk ratios before multiple imputation for comparison.**

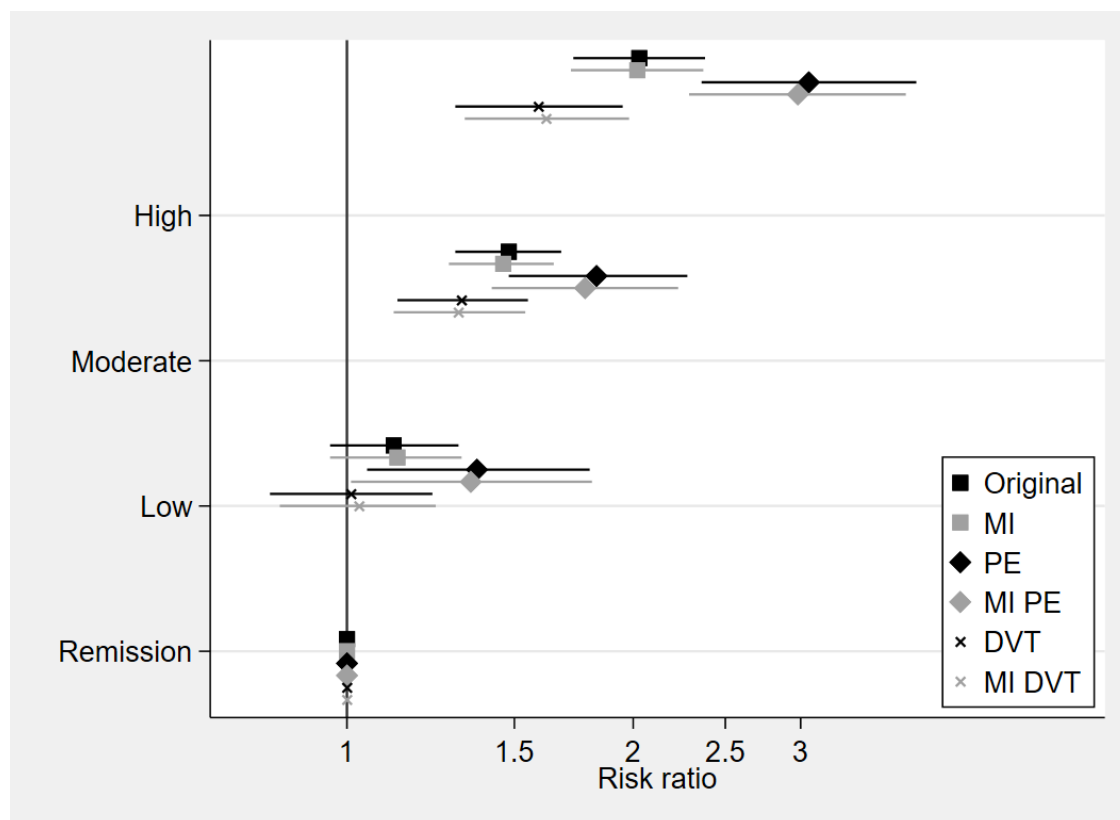

<sup>a</sup>Risk ratios adjusted for age, sex and calendar year of the visit year.
